# Supplementary material for: Construction of a PPIL@COF core–shell composite with enhanced catalytic activity for CO2 conversion
Source: Royal Society of Chemistry journal article supplement (doi:10.1039/d1gc00267h), 2021-01-01
Supplement: d1gc00267h1.pdf [file d1gc00267h1.pdf]

## Supporting Information

### Construction of PPIL@COF Core–Shell Composite with Enhanced Catalytic Activity for CO<sub>2</sub> Conversion

Yi-Ran Du,<sup>a,b</sup> Guang-Rong Ding,<sup>a,b</sup> Yao-Feng Wang,<sup>a</sup> Bao-Hua Xu <sup>a,b\*</sup>, Suo-Jiang Zhang

<sup>a,b</sup>

<sup>a</sup> Beijing Key Laboratory of Ionic Liquids Clean Processes, Institute of Process Engineering, Innovation Academy for Green Manufacture, Chinese Academy of Sciences, 100190, Beijing, China.

<sup>b</sup> School of Chemistry and Chemical Engineering, University of Chinese Academy of Sciences, Beijing 100049, China.

### Contents

**Section 1.** Material and Instrumentation

**Section 2.** Figures S1-S13

**Section 3.** Tables S1

**Section 4.** NMR spectrum

## Section 1. Material and Instrumentation

Divinylbenzene (DVB, mixtures of isomers, 78~80% grade) was distilled under vacuum and azobisisobutyronitrile (AIBN) was recrystallized in ethanol before use. 1-vinylimidazole, 2-bromoethylamine hydrobromide and terephthalaldehyde (Tp) were bought from Adamas Reagent, Ltd. 1,3,5-Tris-(4-aminophenyl)triazine (TAPT) and 2,5-dihydroxyterephthalaldehyde (DHTP) were bought from Jilin Chinese Academy of Sciences-Yanshen Technology Co., Ltd. Solvents (AR grade) were obtained from Beijing Chemical Works. Powder X-ray diffraction (PXRD) was conducted on the PANalytical X'Pert PRO MPD with Cu K $\alpha$  radiation ( $\lambda = 0.1541$  nm), from  $2\theta = 2.5^\circ$  to  $30^\circ$  with  $0.02^\circ$  increments at room temperature. The N<sub>2</sub> sorption isotherms were measured on an automatic volumetric adsorption equipment (Micromeritics ASAP 2020) at 77 K. Prior to the measurements, the samples were activated under vacuum at 120 °C for 10 h. The Brunauer-Emmett-Teller (BET) method was applied for the specific surface areas and pore volume. Pore size distribution was obtained through the nonlocal density functional theory (NLDFE) method. CO<sub>2</sub> adsorption measurements were recorded using a Quantachrome Nova 4000e. The Fourier transform infrared (FT-IR) spectra were collected on a Thermo Nicolet 380 with KBr tableting method in a range of 4000 to 400 cm<sup>-1</sup> with a resolution of 4 cm<sup>-1</sup>. The <sup>1</sup>H and <sup>13</sup>C NMR data were detected *via* a Bruker Avance III 600 MHz spectrometer. The CP-MAS <sup>13</sup>C NMR measurements were carried out with a Bruker AVANCE III HD 500MHz spectrometer. The morphologies and structures were investigated by the Hitachi SU8020 Field emission scanning electron microscopy (FE-SEM) at an accelerating voltage of 5 kV

and all the samples were mounted on a carbon tape and coated with gold prior to measurement. Transmission electron microscopy (TEM) images were obtained with JEM-2100F at 200 kV. Thermogravimetric analysis (TGA) was performed on the Shimadzu TA-60WS Thermal analyser in a range of 30~500 °C with a heating rate of 10 °C min<sup>-1</sup> under nitrogen. X-ray photoelectron spectroscopy (XPS) was conducted using an ESCALAB 250Xi spectrometer by get the sample on the aluminized sheet.

## Section 2. Figures S1-S13

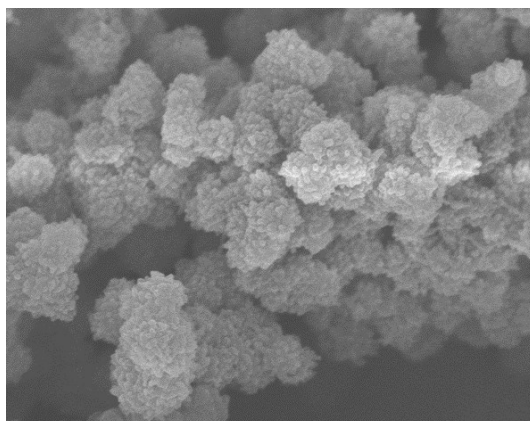

**Fig. S1** The SEM images of PPIL@COFA-20.

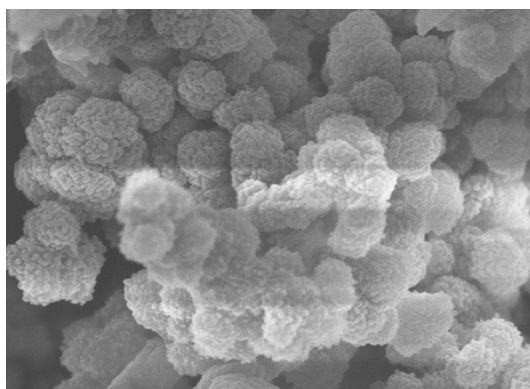

**Fig. S2** The SEM images of PPIL@COFA-60.

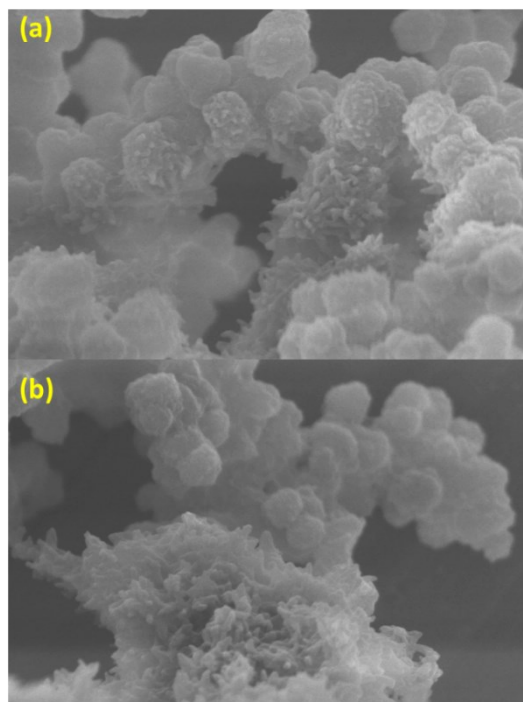

**Fig. S3** SEM image of the hybrids directly using PPIL as without surface functionalization. (a): inhomogeneous growth of COF on the surface of PPIL, (b): uncontrollable bulk COF and PPIL.

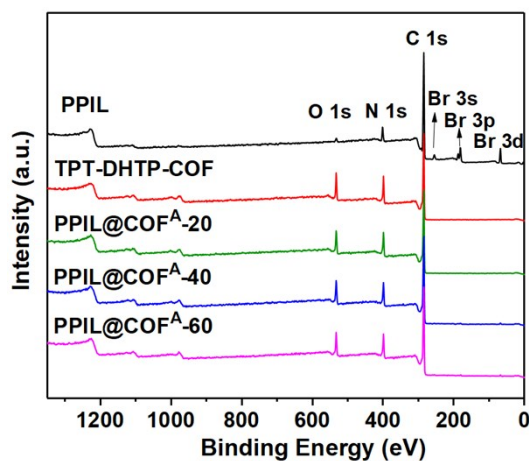

**Fig. S4** The survey XPS spectra of TPT-DHTP-COF, PPIL and PPIL@COF<sup>A</sup> hybrids.

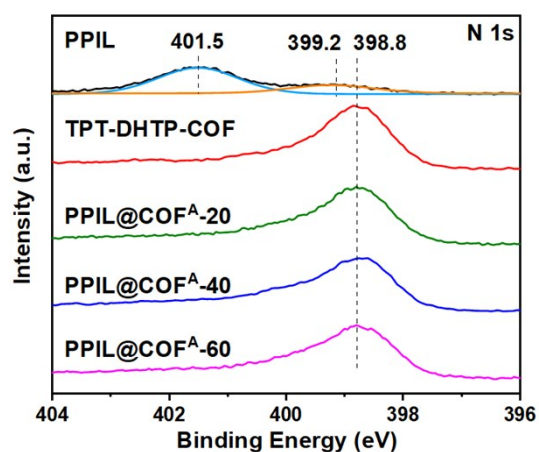

**Fig. S5** N 1s XPS spectra of TPT-DHTP-COF, PPIL and PPIL@COF<sup>A</sup> hybrids.

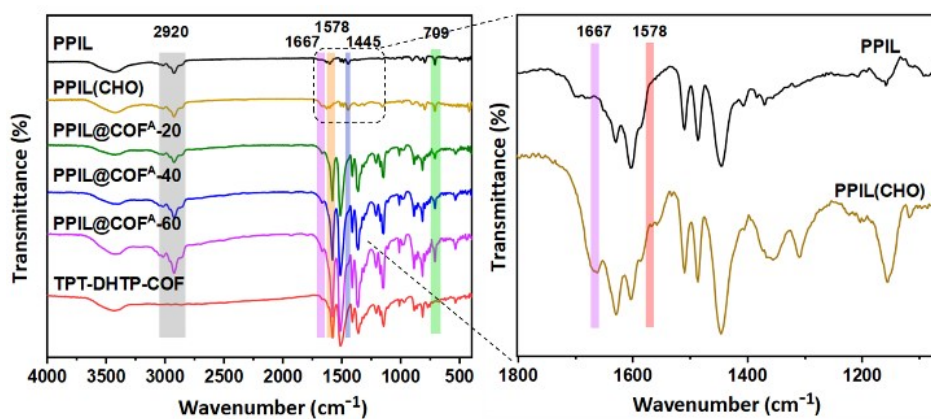

**Fig. S6** FT-IR spectrum of TPT-DHTP-COF, PPIL, PPIL(CHO) and PPIL@COF<sup>A</sup> hybrids.

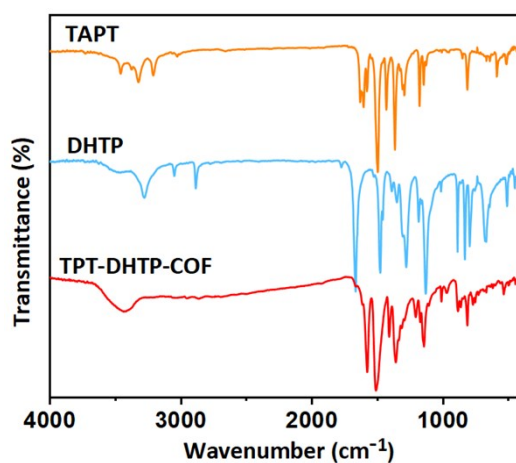

**Fig. S7** FT-IR spectra of TAPT, DHTP and TPT-DHTP-COF.

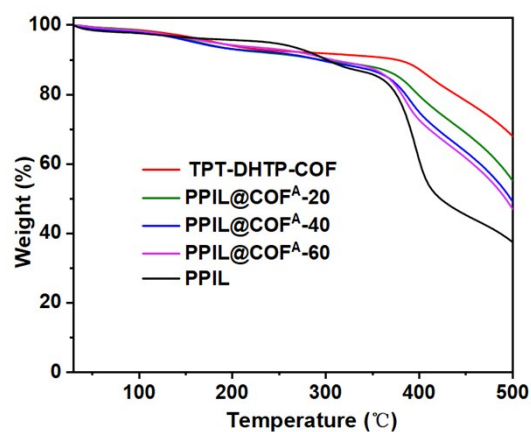

**Fig. S8** TGA curve of PPIL, TPT-DHTP-COF and PPIL@COF<sup>A</sup> hybrids.

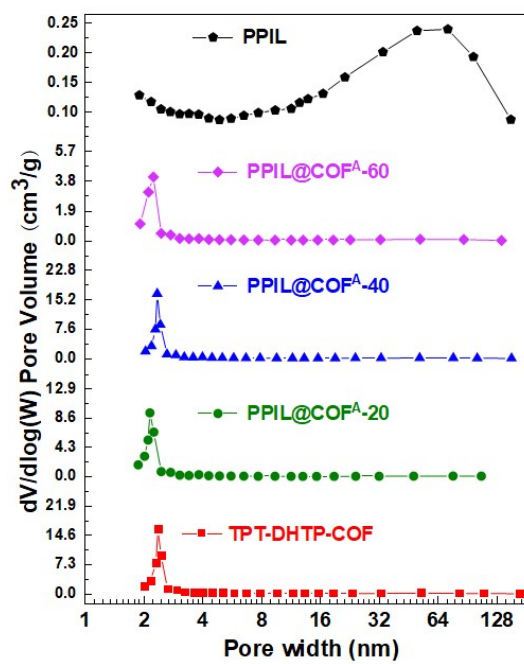

**Fig. S9** Pore width distributions of PPIL, TPT-DHTP-COF and PPIL@COF<sup>A</sup> hybrids.

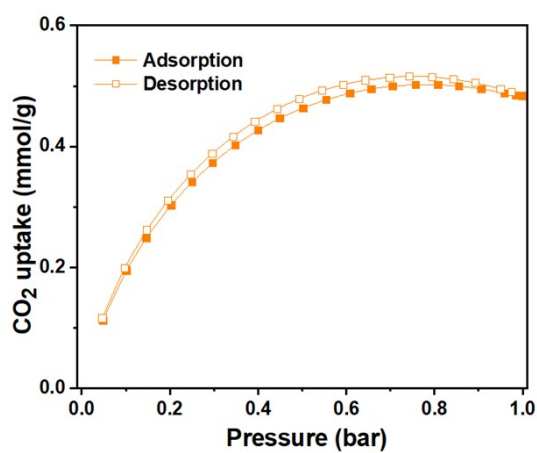

**Fig. S10** CO<sub>2</sub> adsorption isotherms of PPIL@COF<sup>B</sup>-40.

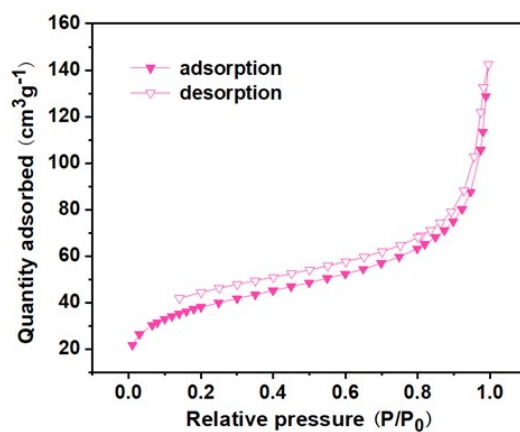

**Fig. S11** BET studies on PPIL@COF<sup>B</sup>-40.

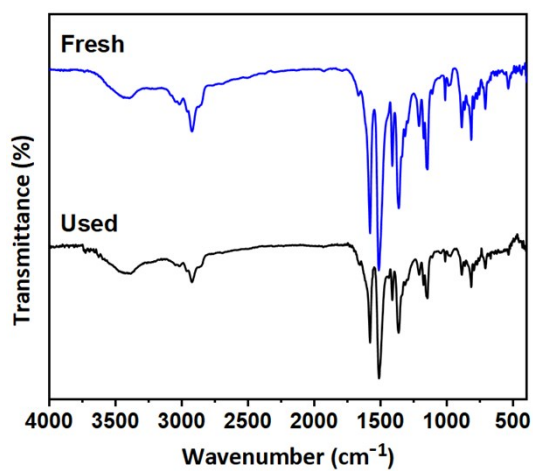

**Fig. S12** FT-IR spectra of the PPIL@COF<sup>A</sup>-40 before use (fresh) and after use for five runs (used).

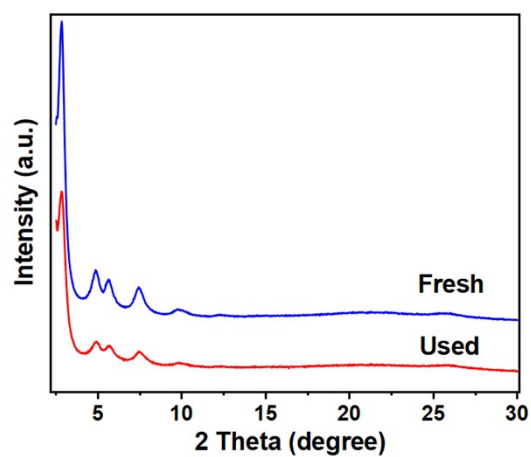

**Fig. S13** XRD spectra of the PPIL@COF<sup>A</sup>-40 before use (fresh) and after use for five runs (used).

### Section 3. Tables S1

Table S1. Bromine mass fraction of PPIL and varied PPIL@COF hybrids.

| Entry | Catalyst                  | Br element content | Loading amount |
|-------|---------------------------|--------------------|----------------|
|       |                           | (wt.%)             | (mmol/g)       |
| 1     | PPIL                      | 5.67               | 0.71           |
| 2     | PPIL@COF <sup>A</sup> -20 | 1.84               | 0.23           |
| 3     | PPIL@COF <sup>A</sup> -40 | 2.72               | 0.34           |
| 4     | PPIL@COF <sup>A</sup> -60 | 3.36               | 0.42           |
| 5     | PPIL@COF <sup>B</sup> -40 | 3.04               | 0.38           |

## Section 4. NMR spectrum

$^1\text{H}$  NMR (600 MHz,  $\text{D}_2\text{O}-d_2$ , 298 K):  $\delta$  = 7.84 (s, 1H), 7.65 (s, 1H), 7.19 (m, 1H), 5.87 (m, 1H), 5.49 (m, 1H), 4.34 (m, 2H), 3.16 (m, 2H).

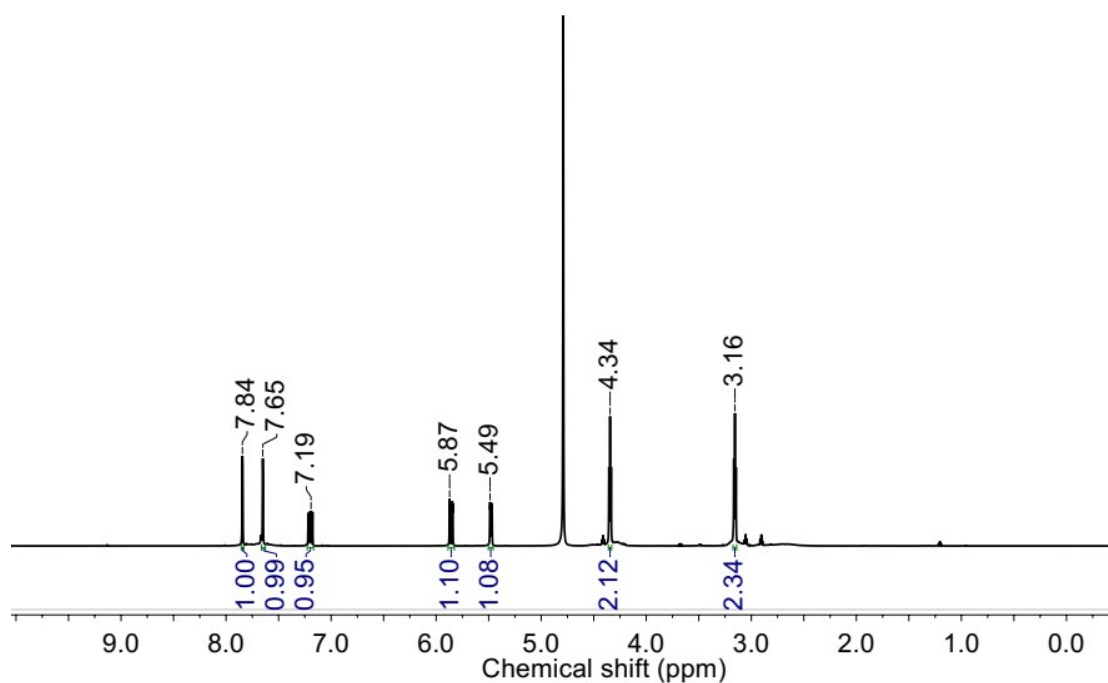

**NMR Spectrum 1**  $^1\text{H}$  NMR (600 MHz,  $\text{D}_2\text{O}-d_2$ , 298K) of [AVIM]Br.
